# Supplementary material for: Perceived Future Outcomes of Unsuccessful Treatment and Their Association with Treatment Persistence Among Type-2 Diabetes Patients: A Cross-Sectional Content Analysis
Source: PubMed Central journal article supplement — Diabetes Ther. 2023 Jun 20;14(9):1437–49. doi: 10.1007/s13300-023-01433-1 (PMC10363091; doi:10.1007/s13300-023-01433-1), 2023-06-20
Supplement: 13300_2023_1433_MOESM1_ESM.pdf [file 13300_2023_1433_MOESM1_ESM.pdf]

## Supplementary material

**Title:** Perceived future outcomes of unsuccessful treatment and their association with treatment persistence among type-2 diabetes patients: a cross-sectional content analysis.

### **Author names:**

Tomoo Hidaka<sup>1</sup>

Rieko Suzuki<sup>2</sup>

Katsue Hashimoto<sup>2</sup>

Mariko Inoue<sup>3</sup>

Yukiko Terada<sup>3</sup>

Shota Endo<sup>1</sup>

Takeyasu Kakamu<sup>1</sup>

Mariko Gunji<sup>2</sup>

Koichi Abe<sup>4</sup>

Tetsuhito Fukushima<sup>1</sup>

### **Affiliations and addresses:**

1: Department of Hygiene and Preventive Medicine, Fukushima Medical University  
Hikarigaoka 1, Fukushima City, Fukushima, 9601295, Japan.

2: Koriyama City Public Health Center

15-1, Asahi 2, Koriyama City, Fukushima, 9638024, Japan.

3: CMR Development Division, Novo Nordisk Pharma Ltd.

2-1-1, Marunouchi, Chiyoda-ku, Tokyo, 1000005, Japan

4: Igarashi Clinic of Medicine and Surgery

12-7, Namiki 2, Koriyama City, Fukushima, 9638026, Japan.

### **Contact information of the corresponding author, Tomoo Hidaka:**

Department of Hygiene and Preventive Medicine, Fukushima Medical University,  
Hikarigaoka 1, Fukushima City, Fukushima, 960-1295, Japan.

E-mail: [thidaka@fmu.ac.jp](mailto:thidaka@fmu.ac.jp)

TEL/FAX: +81-24-547-1174

Table S1. Excluded terms

| <b>Terms excluded due to meaninglessness in coding</b> |                                                                                                                                                                                                                                                  |
|--------------------------------------------------------|--------------------------------------------------------------------------------------------------------------------------------------------------------------------------------------------------------------------------------------------------|
| Noun                                                   |                                                                                                                                                                                                                                                  |
| A                                                      | accordance (1), acquaintance (3), actual example (1), age (5), aggravation (2), alcohol (1), all options (1), all the world (1), alliance (1), ambulance (1), amount (1), around (1), around here (1), attention (4), aunt (1)                   |
| B                                                      | backup (1), bad condition (1), baseball (1), book (1), brain cancer (1), bread (1), business (1)                                                                                                                                                 |
| C                                                      | cake (1), car (1), carbohydrate (1), cardboard (1), child (2), chocolate (1), coffee (1), collapse (1), company (2), concreteness (1), condition (3), consciousness (4), continuity (1), core (1), criterion value (1), cube sugar (1), cure (5) |
| D                                                      | diabetes (43), diagnosis (1), distress (1), doctor (12), dorayaki (Japanese bean-jam pancake) (1), drive (1), drug (15), duty (1)                                                                                                                |
| E                                                      | earthquake (1), earthquake disaster (1), effort (5), episode (14), equal (1), excursion (1), exercise (4), explanation (1)                                                                                                                       |
| F                                                      | face (1), farmer (1), fate (1), father (3), feeling (5), first (7), form (1), frequency (1), friend (3)                                                                                                                                          |
| G                                                      | generation (1), glucose (1), gluttony (1), gum (1)                                                                                                                                                                                               |
| H                                                      | head (2), heavy physical work (1), height (1), hope (1), hospital (10), husband (2)                                                                                                                                                              |
| I                                                      | I (19), insurance (1), interval (1), ischial bone (1)                                                                                                                                                                                            |
| J                                                      | judgment (1), jumping (1), junior colleague (1)                                                                                                                                                                                                  |
| K                                                      | kin (2), kind (1), knowledge (3)                                                                                                                                                                                                                 |
| L                                                      | lavishment (1), life-span (1), lunch bag (1)                                                                                                                                                                                                     |
| M                                                      | major (2), margins (2), meal (4), medical doctor (1), milk (1), mind (7), mood (2), moon (1), mother (5), myself (1)                                                                                                                             |
| N                                                      | near side (1), neglect (1), nerve pain (1), next (1), niece (1), number (2), nurse (1)                                                                                                                                                           |
| O                                                      | ointment (1), older brother (2), older sister (2), otherness (2)                                                                                                                                                                                 |
| P                                                      | pain (2), parent (3), parents' home (1), past (1), peak (3), pee (2), person (24), population (1), position (1), practice (1), pre-diabetes (1), preservation (3), print (1)                                                                     |
| Q                                                      | quickness (1)                                                                                                                                                                                                                                    |
| R                                                      | reality (1), regret (1), rehabilitation (1), relationship (5), relatives (1), repeat (1), residual disease (1), rheumatism (1), risk (1), room (1)                                                                                               |
| S                                                      | same-year classmate (3), satisfaction (1), seminar (1), shape (1), situation (1), size (1), small amount (1), socks (1), son (1), sound (1), status (1), status quo (2),                                                                         |

|                                                              |                                                                                                                                            |
|--------------------------------------------------------------|--------------------------------------------------------------------------------------------------------------------------------------------|
|                                                              | student (1), study (1), subjective complaint (2), sustainment (2), symptom (4)                                                             |
| T                                                            | taint (1), teacher (1), television (3), testing (2), thing (2), thought (1), togetherness (2), toilet (1), town (1), tsunami (1), type (1) |
| U                                                            | unit (1)                                                                                                                                   |
| V                                                            | value (2), victory (1)                                                                                                                     |
| W                                                            | water (1), weight (1), wheelchair (1), wife (4), workplace (1), worry (8), worst (1)                                                       |
| Y                                                            | younger sister (1)                                                                                                                         |
| Verb                                                         |                                                                                                                                            |
| A                                                            | abandon (1), acquire (1), add (1), avoid (3)                                                                                               |
| B                                                            | begin (1), borrow (1), bother (4), bring on (4), bring (1), buy (1)                                                                        |
| C                                                            | carry (1), change (2), choose (1), come (17), consume (1), continue (3)                                                                    |
| D                                                            | decrease (3), differentiate (1), dig into (1), disproportionate (1), do (2), drink (13), dwell (1)                                         |
| E                                                            | eat (5), emerge (12), enjoy (1), enter (1), exceed (2), exchange (2)                                                                       |
| F                                                            | fail (1), feel (1), fit (1)                                                                                                                |
| G                                                            | gain weight (1), get across (1), give up (1), go (13)                                                                                      |
| H                                                            | happen (8), hear (23), hide (1), hold (5), hustle (2)                                                                                      |
| I                                                            | increase (2), involve (1)                                                                                                                  |
| J                                                            | jumble (1)                                                                                                                                 |
| K                                                            | know (8)                                                                                                                                   |
| L                                                            | leave (1), live (2), load (2), look after (2)                                                                                              |
| M                                                            | make effort (1), manage (1), meet (1)                                                                                                      |
| O                                                            | occur (1)                                                                                                                                  |
| P                                                            | paint (1), pass (2), pause (1), prescribe (1), progress (4)                                                                                |
| Q                                                            | quit (1)                                                                                                                                   |
| R                                                            | raise (3), read (1), receive (4), recognize (1), recover (2), refrain (1), return (2), rise (6)                                            |
| S                                                            | say (27), search (2), serve (1), settle (1), sleep (2), slip (1), stand (1), store (1), suffer (1), suffice (2), swell (2)                 |
| T                                                            | take effect (2), talk (1), teach (1), think (46), turn (2)                                                                                 |
| U                                                            | use (1)                                                                                                                                    |
| W                                                            | wake up (1), watch (12), write (1)                                                                                                         |
| <b>Type of term excluded due to the difficulty in coding</b> |                                                                                                                                            |
|                                                              | mimetic word (2), numeral (5), prefix (2), proper noun (4)                                                                                 |

Note: Terms are listed in alphabetical order. The number within brackets indicates the number of subjects who mentioned the term. The sum of the numbers is inconsistent with the total number of subjects because a subject could mention more than one term.

Table S2. Logistic regression on the association between the codes and treatment status

| Explanatory variables           | Age- and sex-adjusted OR (95% CI) |
|---------------------------------|-----------------------------------|
| Blood and Vascular              | 0.788 (0.181, 3.434)              |
| Body                            | 0.809 (0.074, 8.824)              |
| Brain and Heart                 | 5.397 (0.648, 44.924)             |
| Eye                             | 1.925 (0.616, 6.019)              |
| Foot and hand                   | 1.544 (0.471, 5.061)              |
| Kidney, liver, and other organs | 1.295 (0.244, 6.863)              |
| Threat to life                  | 1.105 (0.297, 4.109)              |
| Necrosis                        | 1.667 (0.315, 8.827)              |
| Nerve                           | 0.578 (0.093, 3.578)              |
| Thirsty                         | 0.345 (0.02, 5.917)               |
| Abstract                        | 1.011 (0.331, 3.092)              |
| Family                          | 0.98 (0.177, 5.422)               |
| Restriction in life             | 1.51 (0.29, 7.874)                |

Note: The objective variable was treatment status (persistent). The odds ratios and 95% confidence intervals for age and sex were omitted for readability.
